# Supplementary material for: Nicotinic Acetylcholine Receptor Subunit α7 Mediates Cigarette Smoke-Induced PD-L1 Expression in Human Bronchial Epithelial Cells
Source: MDPI journal article supplement (doi:10.3390/cancers13215345), 2021-10-25
Supplement: s1 [file s1]

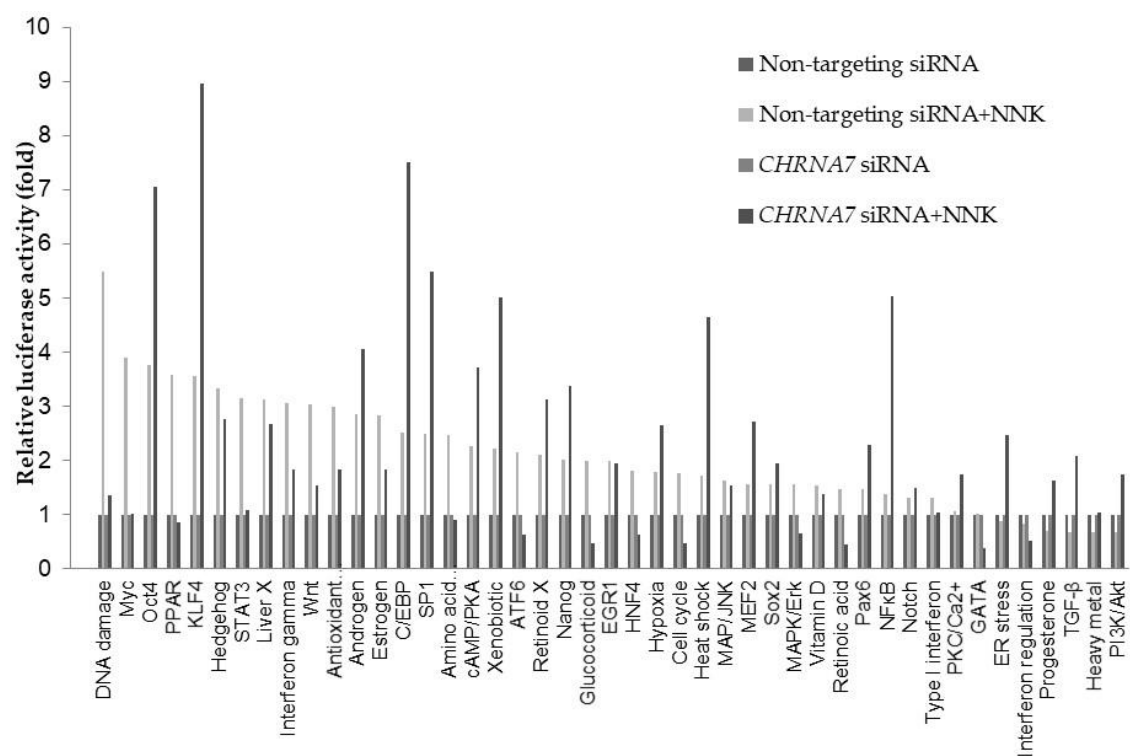

**Figure S1.** Waterfall plot of Signal 45-pathway reporter array. BS65.2N-KT HBECs were transfected with *CHRNA7* siRNA or non-targeting siRNA and treated with or without NNK (10μM). Cells were then co-transfected with various luciferase reporter vectors included in the Signal 45-pathway reporter array. Normalized luciferase activities were compared with those of NNK-untreated cells.

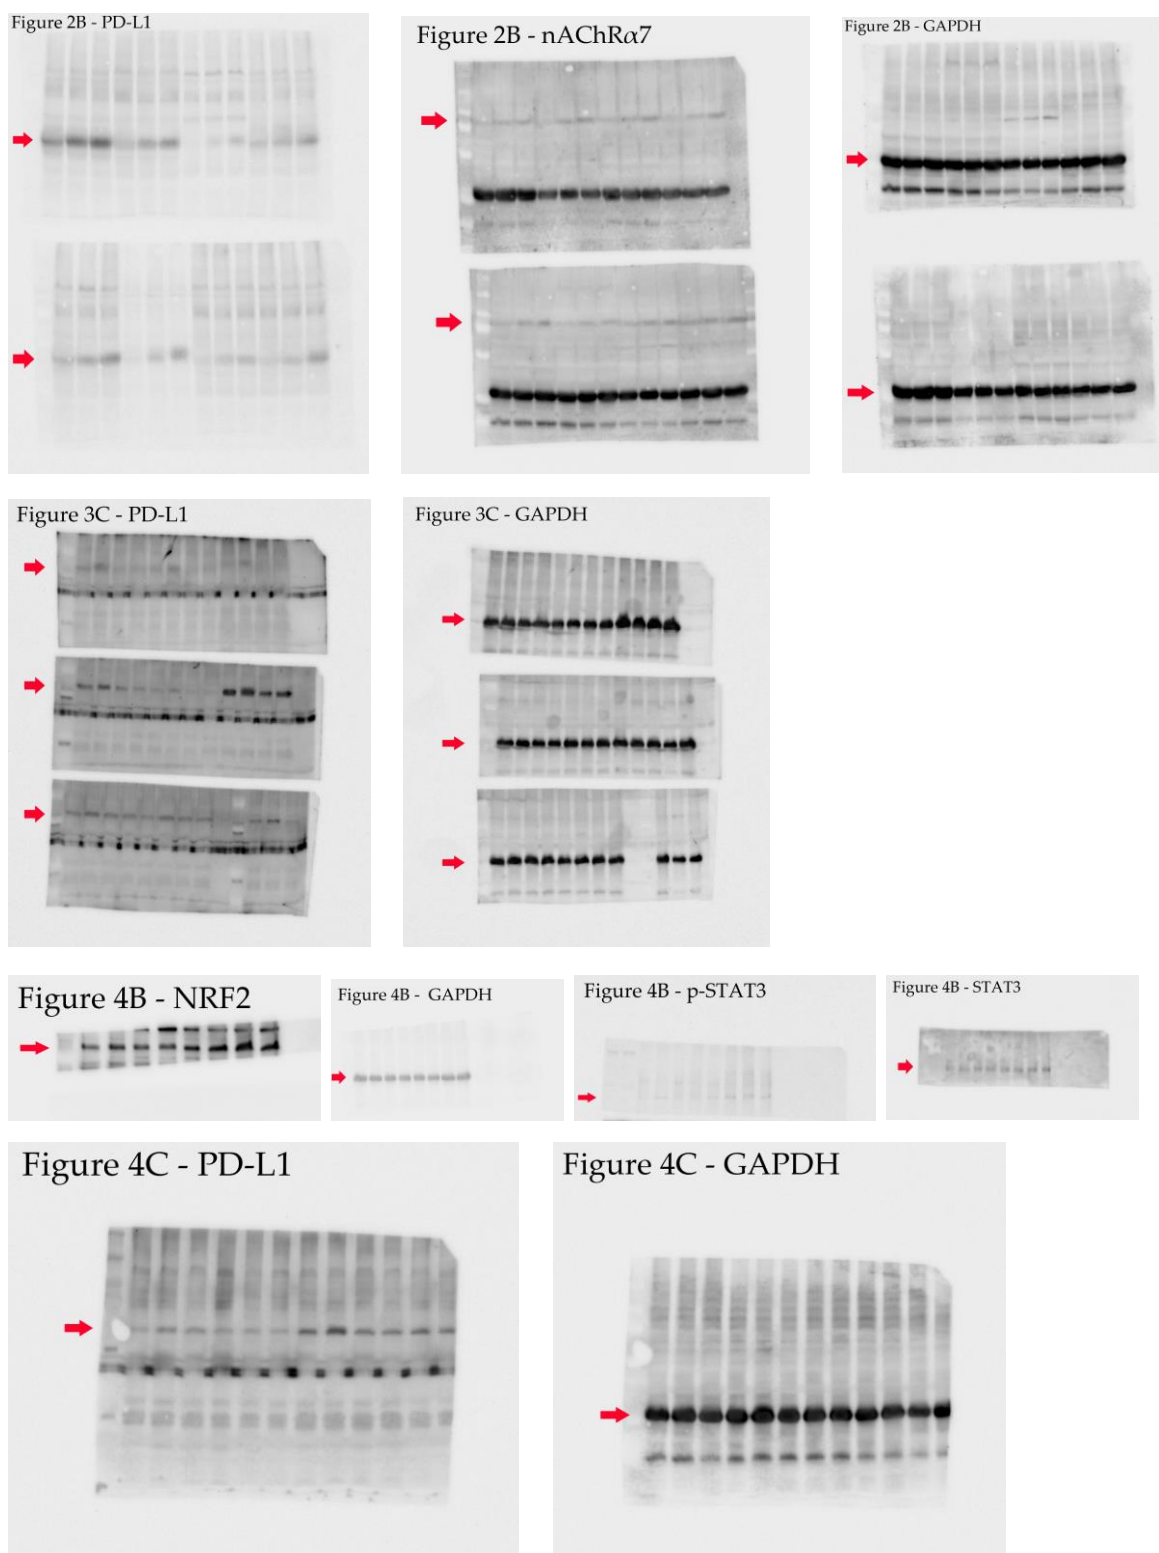

**Figure S2.** Uncropped images for all Western blot analysis with the indicated target proteins.
